# Supplementary material for: Tuning Photophysical Properties via Positional Isomerization of the Pyridine Ring in Donor–Acceptor-Structured Aggregation-Induced Emission Luminogens Based on Phenylmethylene Pyridineacetonitrile Derivatives
Source: MDPI journal article supplement (doi:10.3390/molecules28073282), 2023-04-06
Supplement: s1 [file s1]

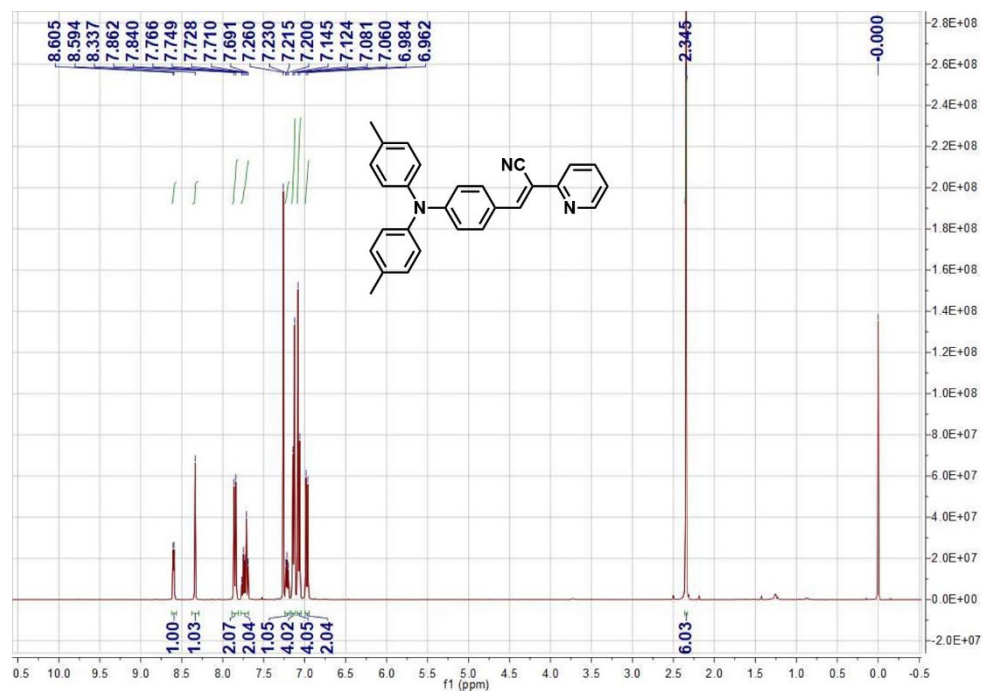

**Figure S1.**  $^1\text{H}$  NMR (400 MHz,  $\text{CDCl}_3$ ) spectrum of compound *o*-DBCNPY.

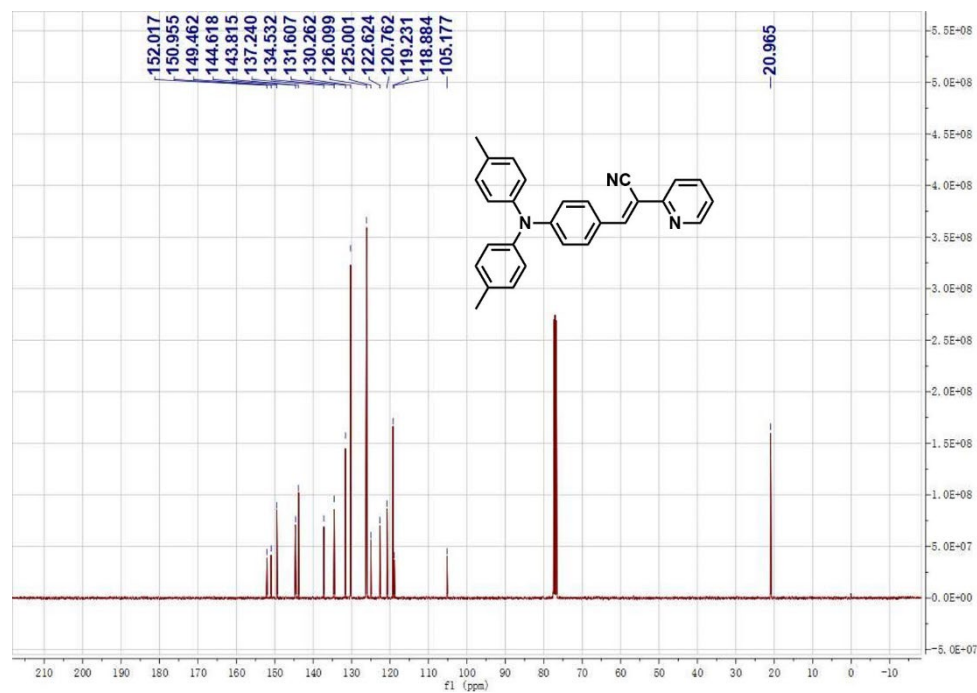

**Figure S2.**  $^{13}\text{C}$  NMR (100 MHz,  $\text{CDCl}_3$ ) spectrum of compound *o*-DBCNPY.

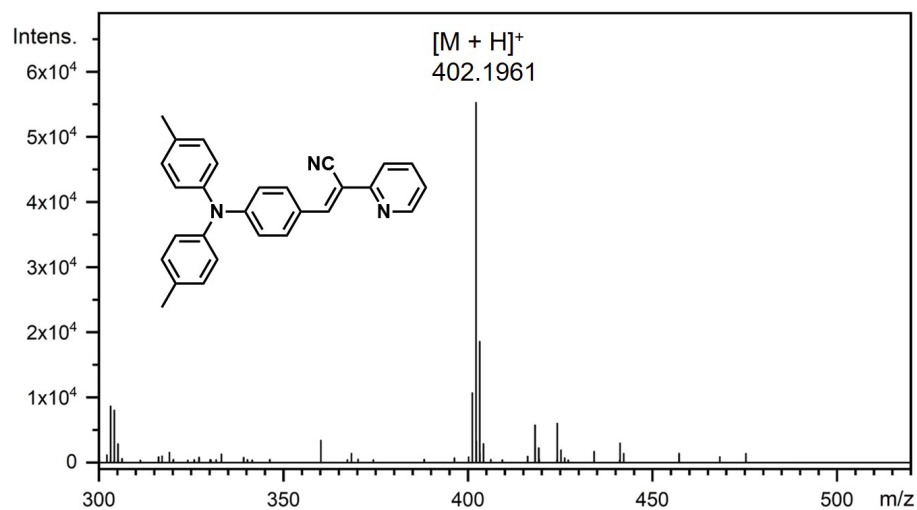

Figure S3. HR-MS spectrum of compound *o*-DBCNPY.

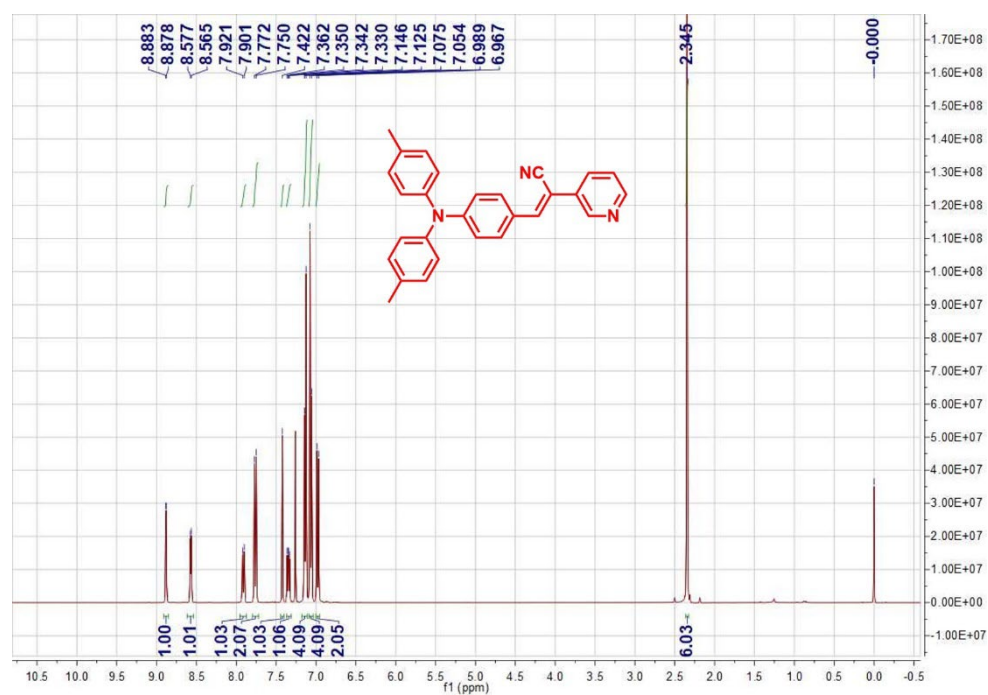

Figure S4.  $^1\text{H}$  NMR (400 MHz,  $\text{CDCl}_3$ ) spectrum of compound *m*-DBCNPY.

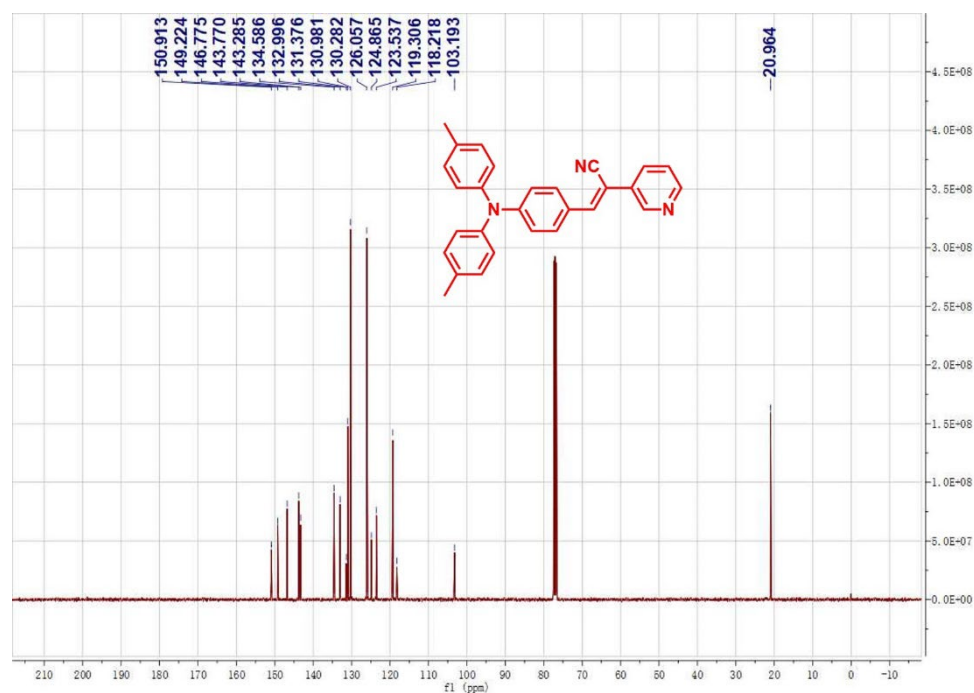

**Figure S5.** <sup>13</sup>C NMR (100 MHz, CDCl<sub>3</sub>) spectrum of compound *m*-DBCNPY.

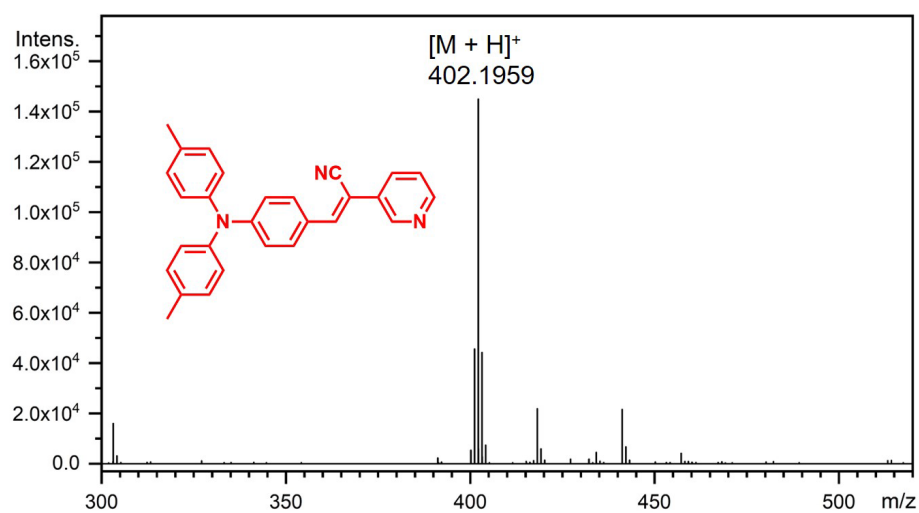

**Figure S6.** HR-MS spectrum of compound *m*-DBCNPY.

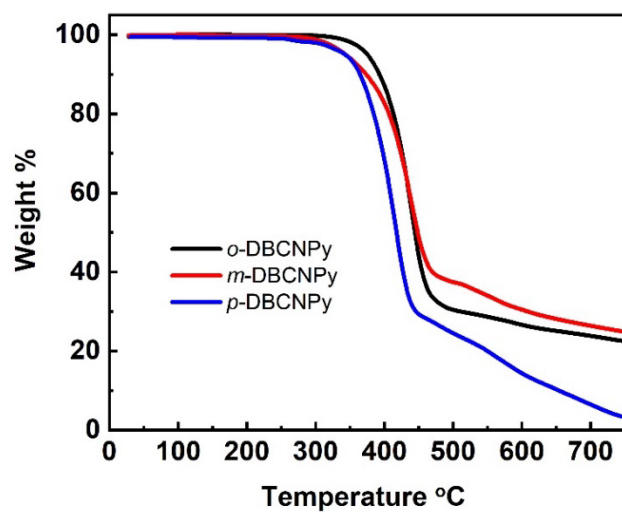

Figure S7. TGA curves of *o*-DBCNPY, *m*-DBCNPY and *p*-DBCNPY.

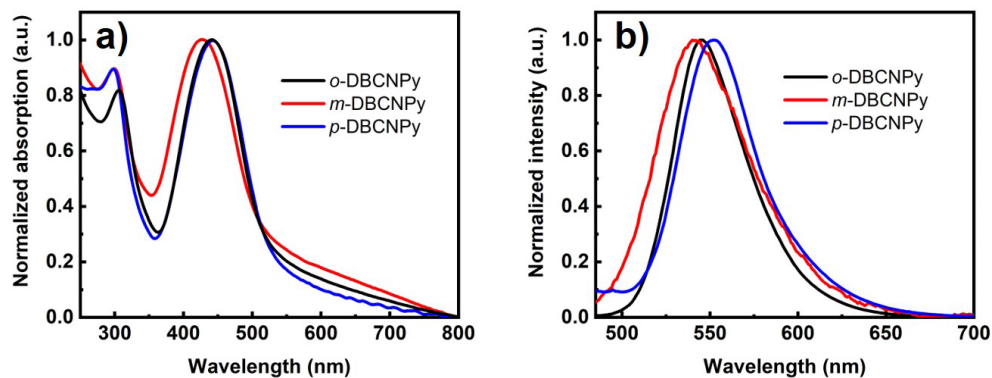

Figure S8. Absorption (a) and fluorescence emission (b) spectra of the non-doped film of the compounds.

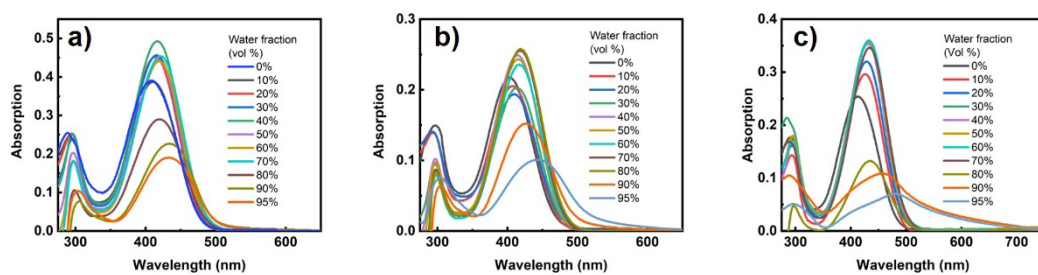

Figure S9. Absorption spectra of *o*-DBCNPY (a), *m*-DBCNPY (b) and *p*-DBCNPY (c) in THF/water mixtures. Concentration:  $1 \times 10^{-5}$  M.

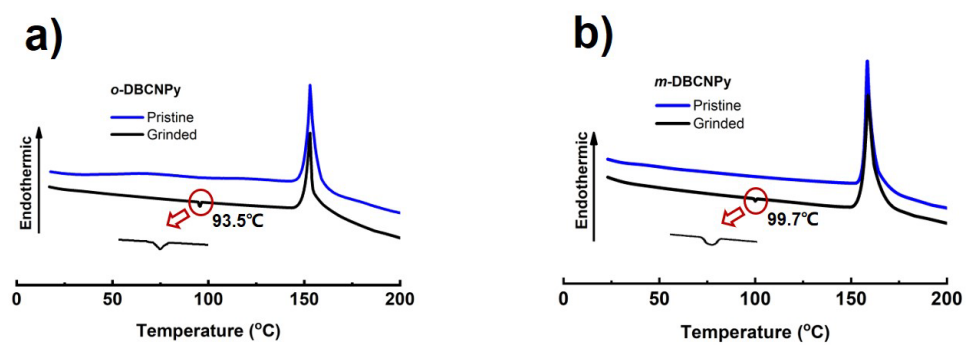

Figure S10. DSC curves of *o*-DBCNPY (a) and *m*-DBCNPY (b) in different states.
